# Supplementary material for: Fibroblast growth factor 8b (FGF-8b) enhances myogenesis and inhibits adipogenesis in rotator cuff muscle cell populations in vitro
Source: PubMed Central journal article supplement — Proc Natl Acad Sci U S A. 2023 Dec 26;121(1):e2314585121. doi: 10.1073/pnas.2314585121 (PMC10769839; doi:10.1073/pnas.2314585121), 2023-12-26
Supplement: pnas.2314585121.sapp.pdf [file pnas.2314585121.sapp.pdf]

## **Supporting Information for**

Fibroblast growth factor 8b (FGF-8b) enhances myogenesis and inhibits adipogenesis in rotator cuff muscle cell populations in vitro

Takayoshi Otsuka, Ho-Man Kan, Paulos Y. Mengsteab, Breajah Tyson, and Cato T. Laurencin

Cato T. Laurencin  
Email: laurencin@uchc.edu

### **This PDF file includes:**

Figures S1 to S5  
Tables S1 to S2

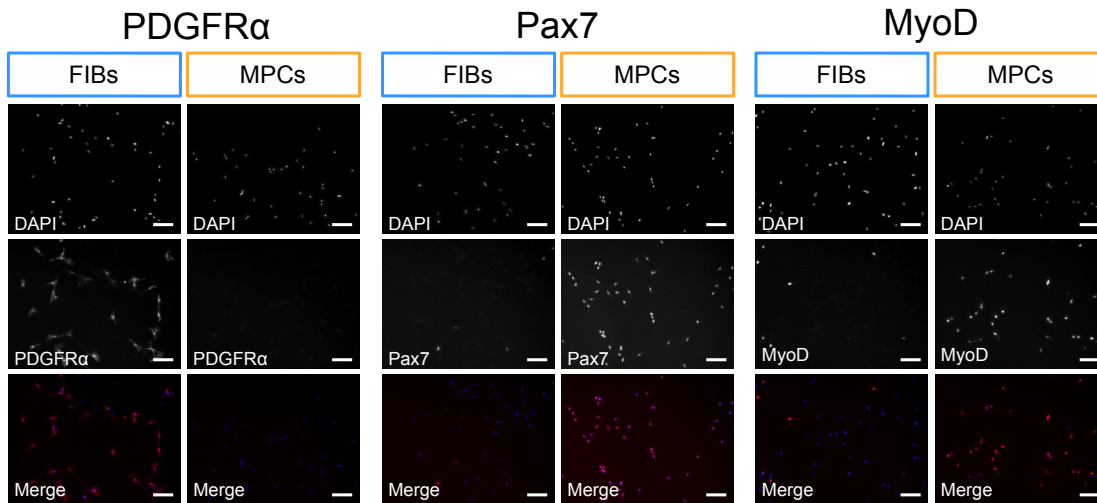

**Fig. S1. Representative fluorescent images of FIBs and MPCs stained with PDGFR $\alpha$ , Pax7, and MyoD.** The quantification of cell numbers is shown in Fig 1K.

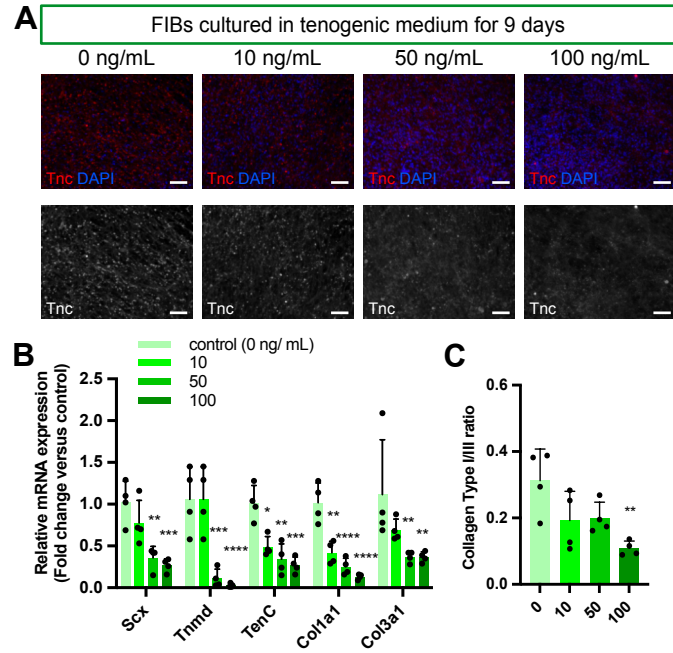

**Fig. S2. FGF-8b suppresses tenogenesis of FIBs.** (A) Representative fluorescent images stained with Tenascin C (Tnc) after 9 days of culture at the different concentrations of FGF-8b. (B) mRNA expression of tenogenic marker genes (Scx, Tnmd, and Tnc) and tendon extracellular matrix proteins (Col1a1 and Col3a1). Data are expressed as fold change relative to the tenogenic control condition (0 mg/mL) (n = 4). (C) The ratio of Col1a1/Col3a1 mRNA expression level at the different concentrations of FGF-8b (n = 4). Scale bar: 100  $\mu$ m.

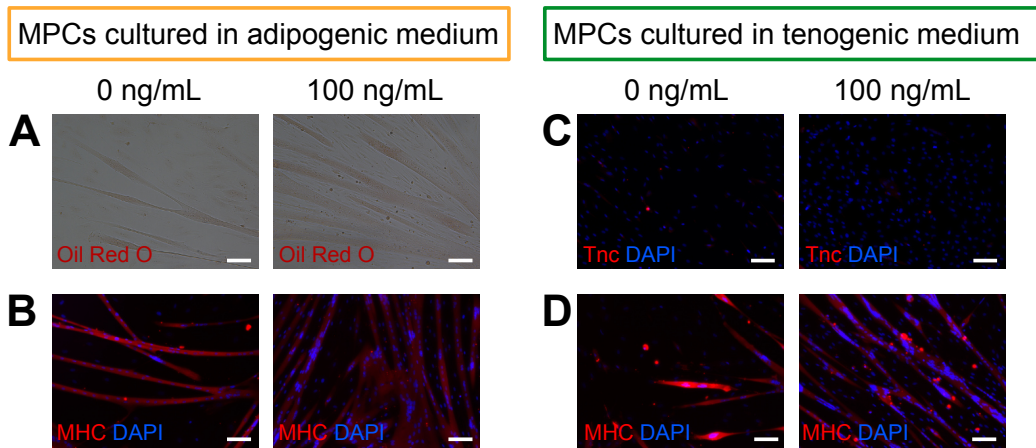

**Fig. S3. MPCs did not undergo adipogenic or tenogenic differentiation.** (A) Representative images of the stained lipid droplets after 9 days of culture with or without FGF-8b under adipogenic induction. (B) Representative fluorescent images stained with MHC after 9 days of culture with or without FGF-8b under adipogenic induction. (C) Representative fluorescent images stained with TenC after 9 days of culture with or without FGF-8b under tenogenic induction. (D) Representative fluorescent images stained with MHC after 9 days of culture with or without FGF-8b under tenogenic induction.

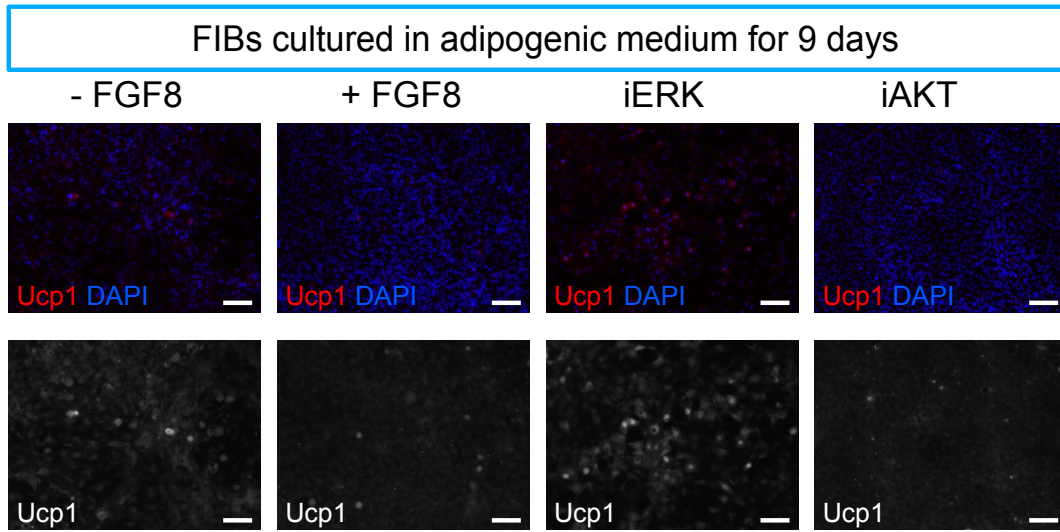

Fig. S4. Representative fluorescent images stained with Ucp1 after 9 days of culture.

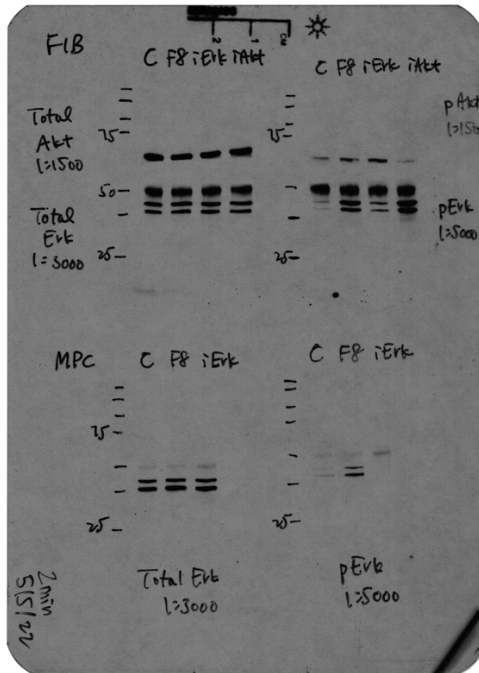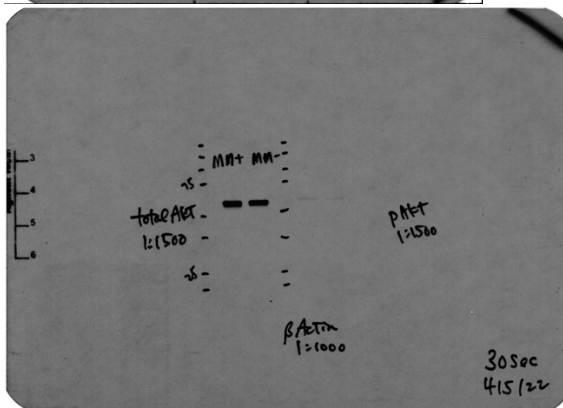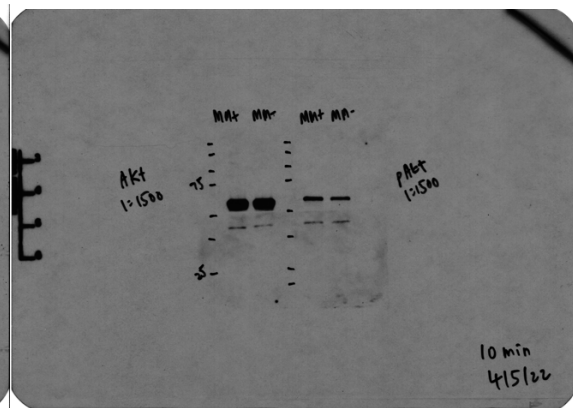

Fig. S5. Full blot images shown in this study.

**Table S1. TaqMan Assay ID used for quantitative real-time PCR.**

| Gene Symbol   | TaqMan Assay ID | Entrez Gene ID | GenBank ID     | Gene Name                                            |
|---------------|-----------------|----------------|----------------|------------------------------------------------------|
| <b>Pparg</b>  | Rn00440945_m1   | 25664          | NM_013124.3    | peroxisome proliferator-activated receptor gamma     |
| <b>Fabp4</b>  | Rn00670361_m1   | 79451          | NM_053365.1    | fatty acid binding protein 4                         |
| <b>Adipoq</b> | Rn00595250_m1   | 246253         | NM_144744.3    | adiponectin                                          |
| <b>Lep</b>    | Rn00565158_m1   | 25608          | NM_013076.3    | leptin                                               |
| <b>Pdgfra</b> | Rn01417537_m1   | 25267          | NM_012802.1    | platelet derived growth factor receptor alpha        |
| <b>Ucp1</b>   | Rn00562126_m1   | 24860          | NM_012682.2    | uncoupling protein 1                                 |
| <b>Scx</b>    | Rn01504576_m1   | 680712         | NM_001130508.1 | scleraxis bHLH transcription factor                  |
| <b>Tnmd</b>   | Rn00574164_m1   | 64104          | NM_022290.1    | tenomodulin                                          |
| <b>Tnc</b>    | Rn01454948_m1   | 116640         | NM_053861.1    | tenascin C                                           |
| <b>Col1a1</b> | Rn01463848_m1   | 29393          | NM_053304.1    | collagen type I alpha 1 chain                        |
| <b>Col3a1</b> | Rn01437681_m1   | 84032          | NM_032085.1    | collagen type III alpha 1 chain                      |
| <b>Pax7</b>   | Rn01518732_m1   | 500574         | NM_001191984.1 | paired box 7                                         |
| <b>Myod1</b>  | Rn00598571_m1   | 337868         | NM_176079.1    | myogenic differentiation 1                           |
| <b>Myog</b>   | Rn00567418_m1   | 29148          | NM_017115.2    | myogenin                                             |
| <b>Myf5</b>   | Rn01502778_m1   | 299766         | NM_001106783.1 | myogenic factor 5                                    |
| <b>Des</b>    | Rn00574732_m1   | 64362          | NM_022531.1    | desmin                                               |
| <b>Tnnt1</b>  | Rn00592835_m1   | 171409         | NM_134388.2    | troponin T1, slow skeletal type                      |
| <b>Fgfr1</b>  | Rn00577234_m1   | 79114          | NM_024146.1    | fibroblast growth factor receptor 1                  |
| <b>Fgfr2</b>  | Rn01269940_m1   | 25022          | NM_012712.1    | fibroblast growth factor receptor 2                  |
| <b>Fgfr3</b>  | Rn00584799_m1   | 84489          | NM_053429.1    | fibroblast growth factor receptor 3                  |
| <b>Fgfr4</b>  | Rn01441815_m1   | 25114          | NM_001109904.1 | fibroblast growth factor receptor 4                  |
| <b>Gapdh</b>  | Rn01775763_g1   | 24383          | NM_017008.4    | glyceraldehyde-3-phosphate dehydrogenase             |
| <b>Fgf8</b>   | Rn00590996_m1   | 29349          | NM_133286.1    | fibroblast growth factor 8                           |
| <b>Ucp1</b>   | Rn00562126_m1   | 24860          | NM_012682.2    | uncoupling protein 1 (mitochondrial, proton carrier) |

**Table S2. List of antibodies.**

| <b>Antibodies</b>                | <b>Product code</b>     | <b>Manufacturer</b>       | <b>Nature of antibodies</b> | <b>Dilution</b>       |
|----------------------------------|-------------------------|---------------------------|-----------------------------|-----------------------|
| Erk1/2                           | 4695 [137F5]            | Cell Signaling Technology | Monoclonal (rabbit)         | 1:3000                |
| Phospho-Erk1/2                   | 4370 [D13.14.4E]        | Cell Signaling Technology | Monoclonal (rabbit)         | 1:5000                |
| Akt                              | 9272                    | Cell Signaling Technology | Polyclonal (rabbit)         | 1:1500                |
| Phospho-Akt                      | 9271                    | Cell Signaling Technology | Polyclonal (rabbit)         | 1:1500                |
| Anti-rabbit (HRP)                | 972-4446                | Bio-rad                   | Polyclonal (goat)           | 1:3000                |
| Vimentin                         | ab92547 [EPR3776]       | Abcam                     | Monoclonal (rabbit)         | 1:250 (2 µg / mL)     |
| αSMA                             | MA5-11547 [1A4]         | Invitrogen                | Monoclonal (mouse)          | 1:100 (0.4 µg / mL)   |
| PDGFRα                           | ab203491 [EPR22059-270] | Abcam                     | Monoclonal (rabbit)         | 1:500 (1.214 µg / mL) |
| Pax7                             | PAX7                    | DSHB                      | Monoclonal (mouse)          | 2 µg / mL             |
| MyoD                             | LS-C392310 [SPM427]     | LSBio                     | Monoclonal (mouse)          | 1:200 (1 µg / mL)     |
| Desmin                           | 14-9747-82 [DE-U-10]    | Invitrogen                | Monoclonal (mouse)          | 1:100 (5 µg / mL)     |
| TnC                              | NB110-68136 [4C8MS]     | Novus Biologicals         | Monoclonal (mouse)          | 1:200 (5 µg / mL)     |
| MHC                              | MF20                    | DSHB                      | Monoclonal (mouse)          | 2 µg / mL             |
| Ucp1                             | bs-1925R                | Bioss Antibodies          | Polyclonal (rabbit)         | 1:200 (5 µg / mL)     |
| Anti-Rabbit IgG Alexa Fluor® 594 | ab150080                | Abcam                     | Polyclonal (goat)           | 1:1000                |
| Anti-Mouse IgG Alexa Fluor® 594  | ab150116                | Abcam                     | Polyclonal (goat)           | 1:1000                |
